# Supplementary material for: CuO/SiO2: a simple and efficient solid acid catalyst for epoxide ring opening
Source: Royal Society of Chemistry journal article supplement (doi:10.1039/c0gc00719f), 2011-01-01
Supplement: c0gc00719f.pdf [file c0gc00719f.pdf]

## SUPPORTING DATA

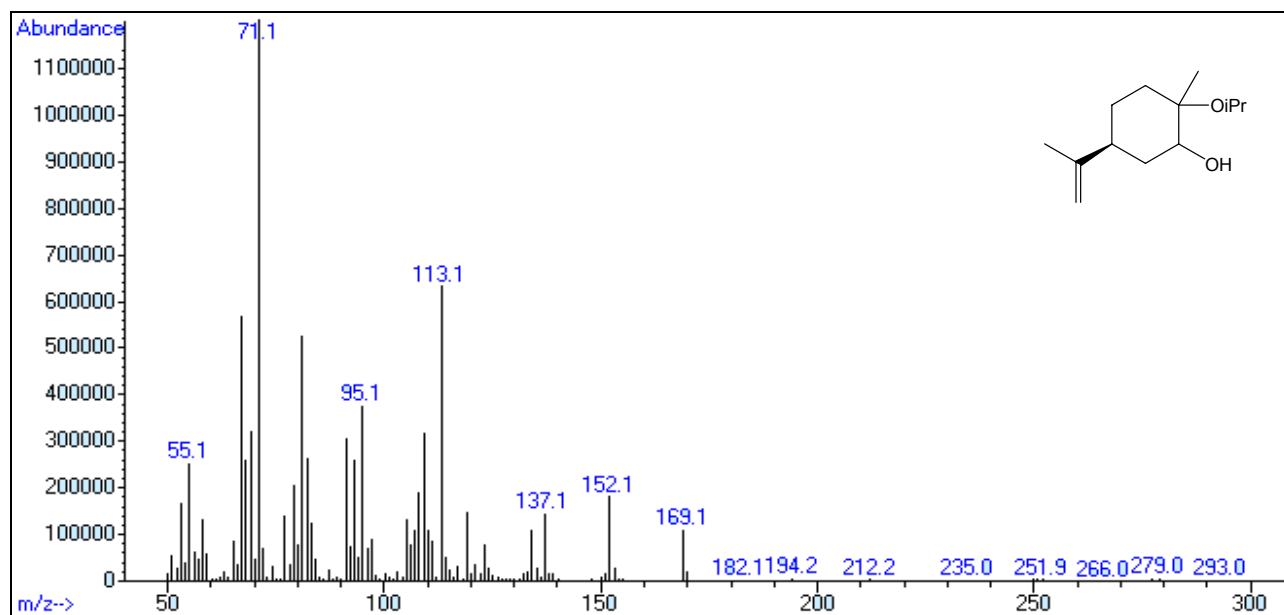

$^{13}\text{C}$  APT { $^1\text{H}$ }

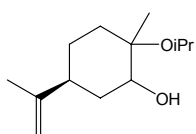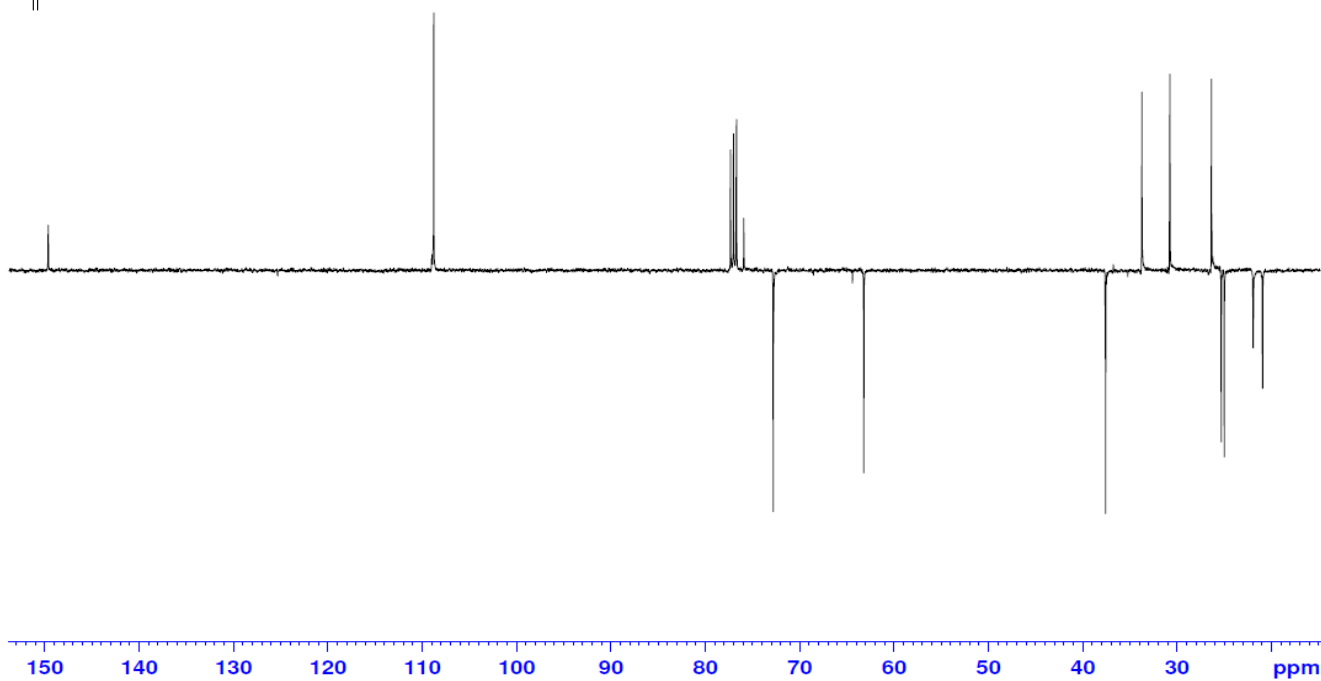

COSYGP (correlata 1H-1H)

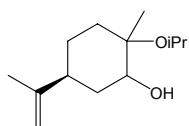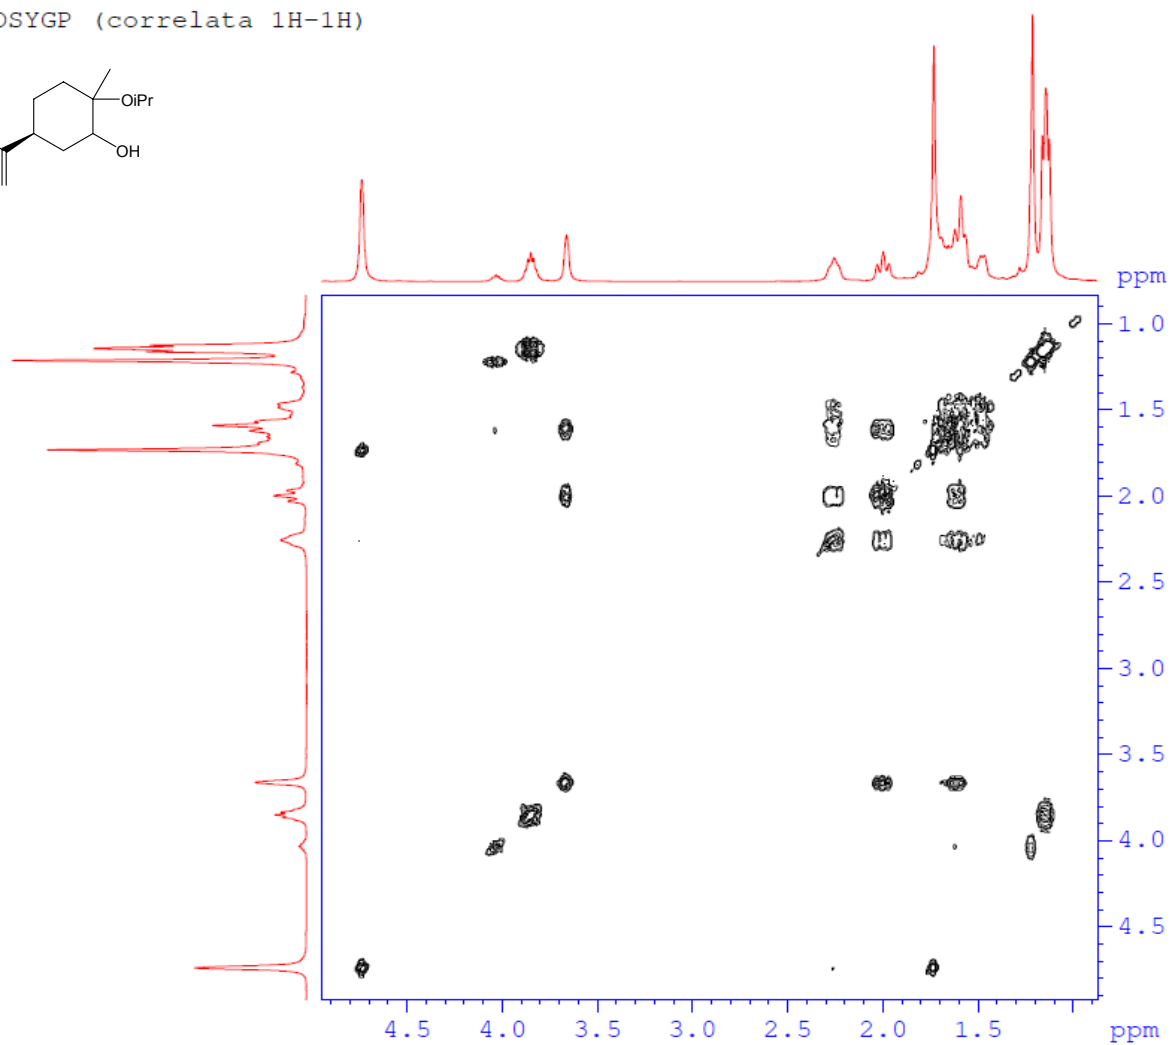

HMBC; Correlata inversa 1H-13C long-range

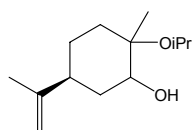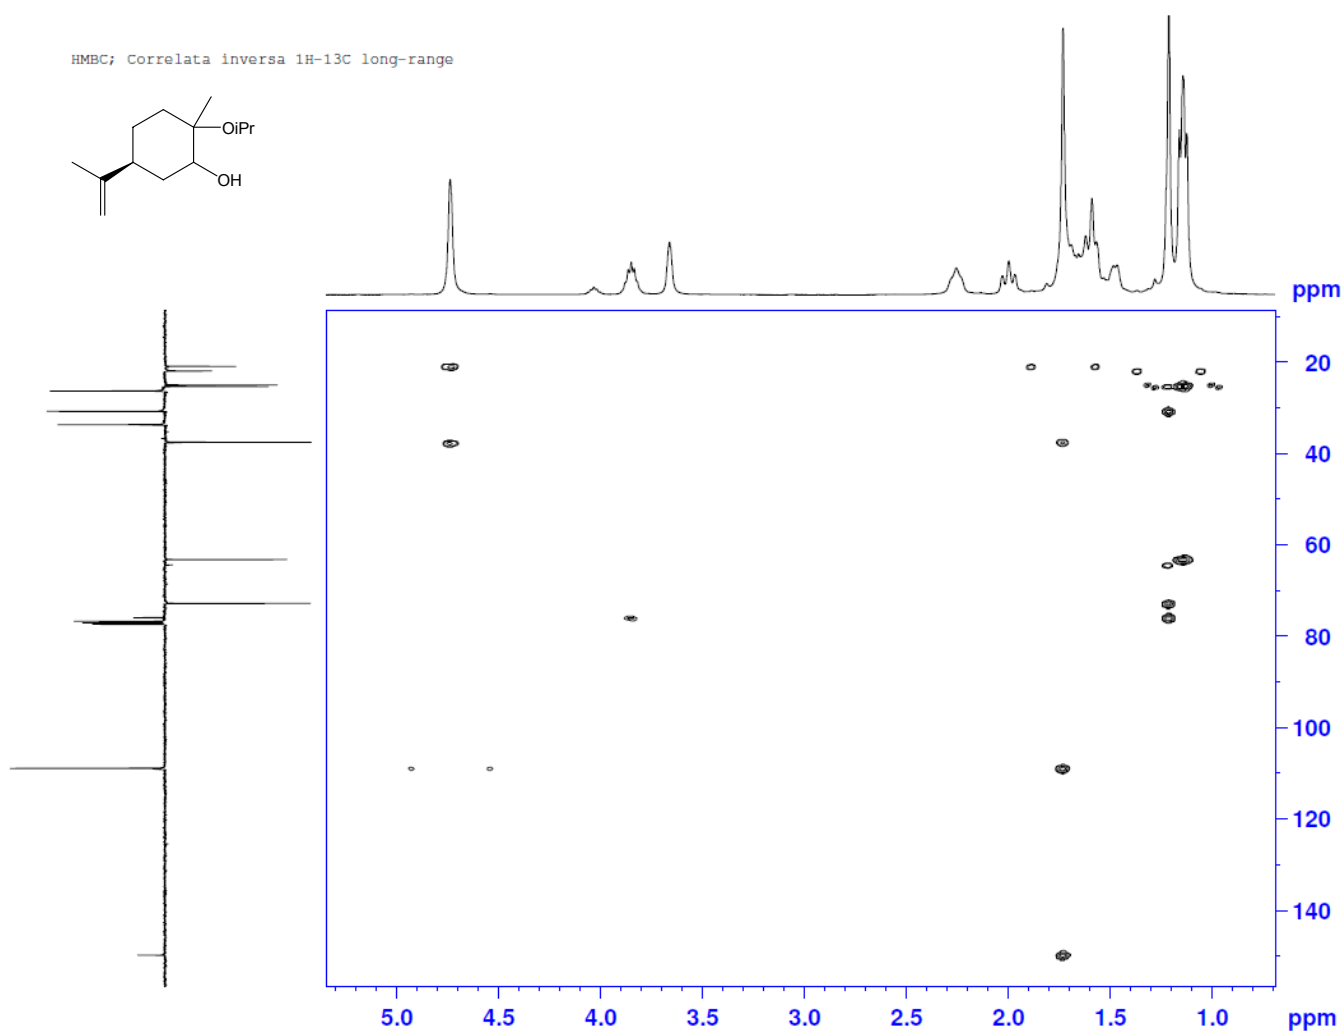

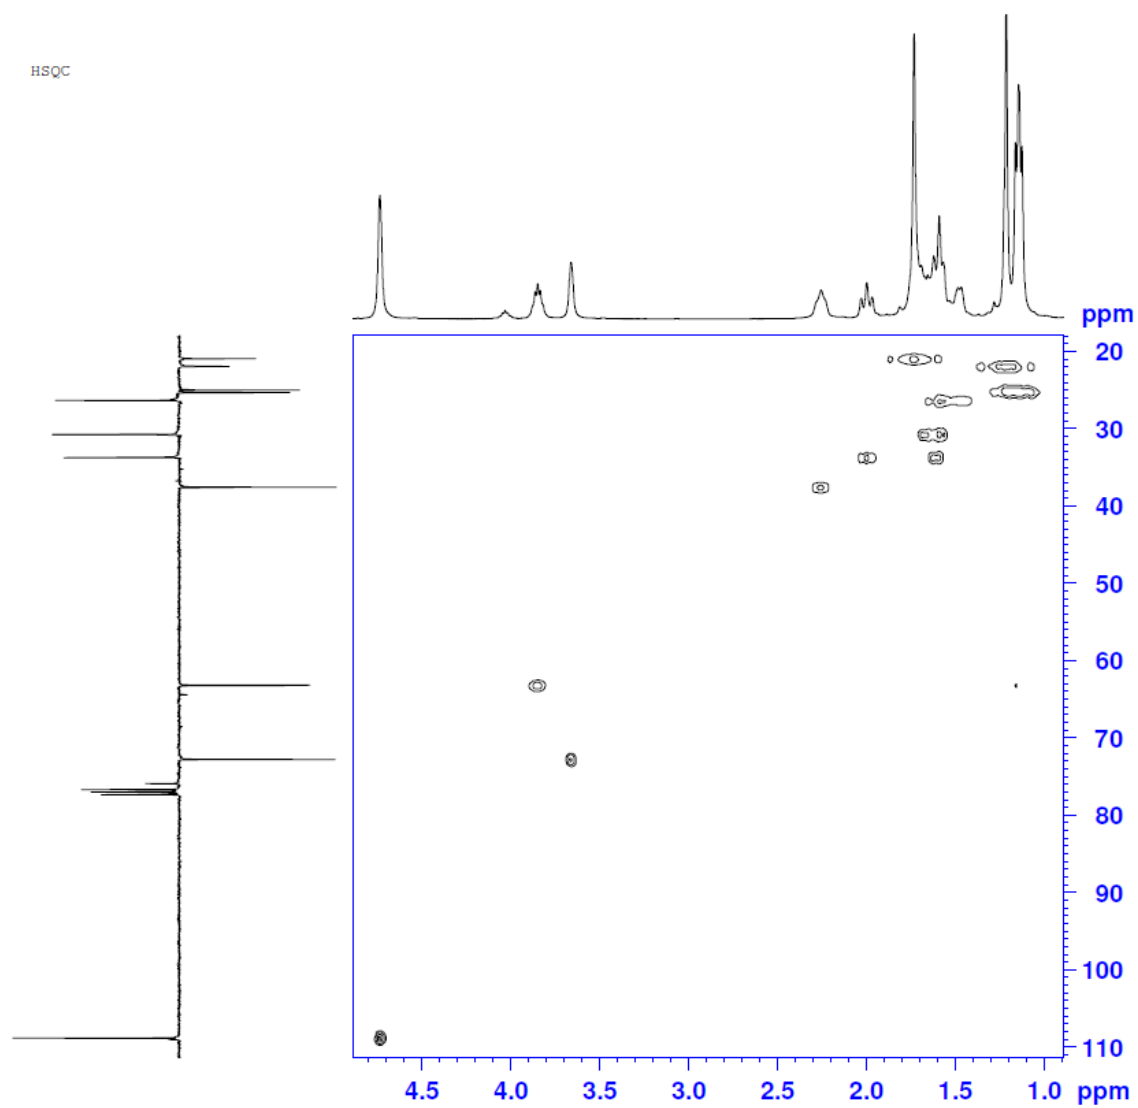

### Alcoholysis of (+)-(R)-styrene oxide

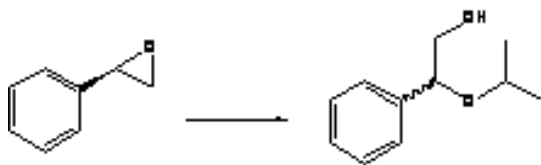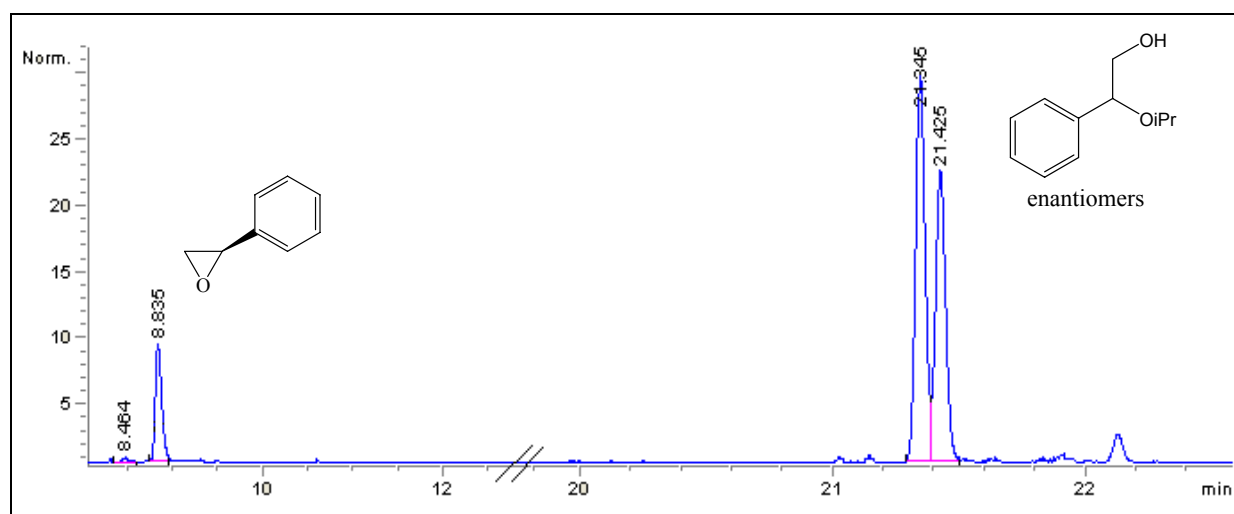

In a typical alcoholysis reaction a solution of (+)-(R)-styrene oxide (0.8 mmol) in 2-PrOH (5 mL) is stirred with the solid catalyst (100 mg, 12% wt Cu) at 60°C under nitrogen and the reaction mixture analysed by GC and GC-FID chromatography (BETA DEX 325 Chiral Capillary Column).
